# Supplementary material
Source: PubMed Central journal article supplement (PMC3401319)
Supplement: NIHMS382543-supplement-2.pdf [file NIHMS382543-supplement-2.pdf]

Figure S1

**A**

| Species | L102 RT aa781-800    |
|---------|----------------------|
| Human   | FKENYKPLLKEIKEETNKWK |
| Rhesus  | -----S---D-----      |
| Mouse   | -----D-----          |

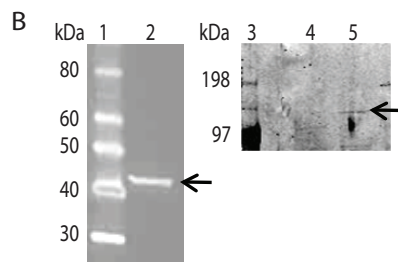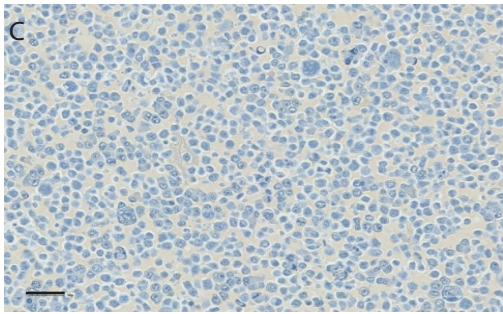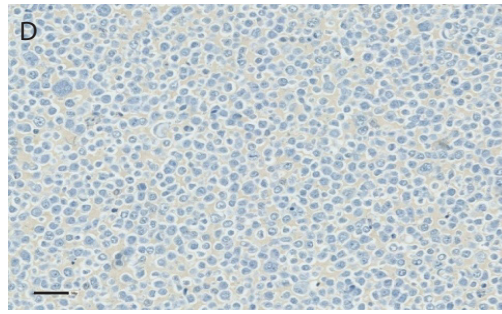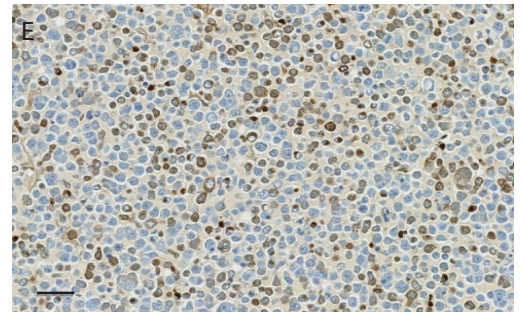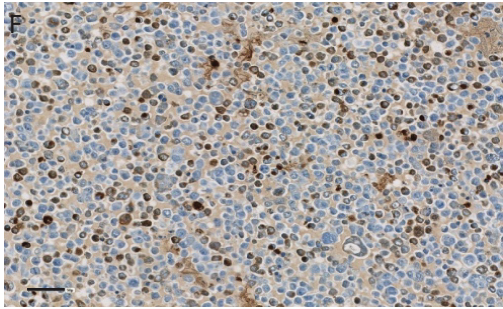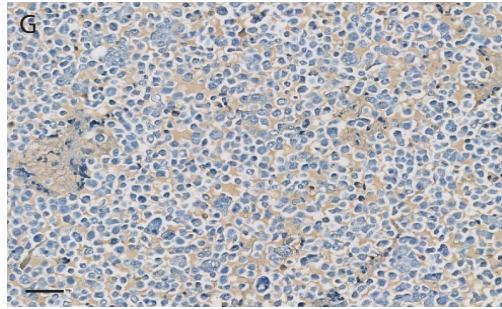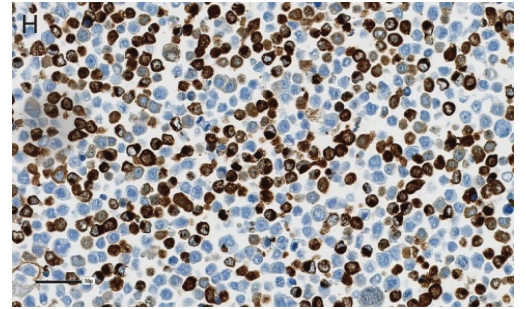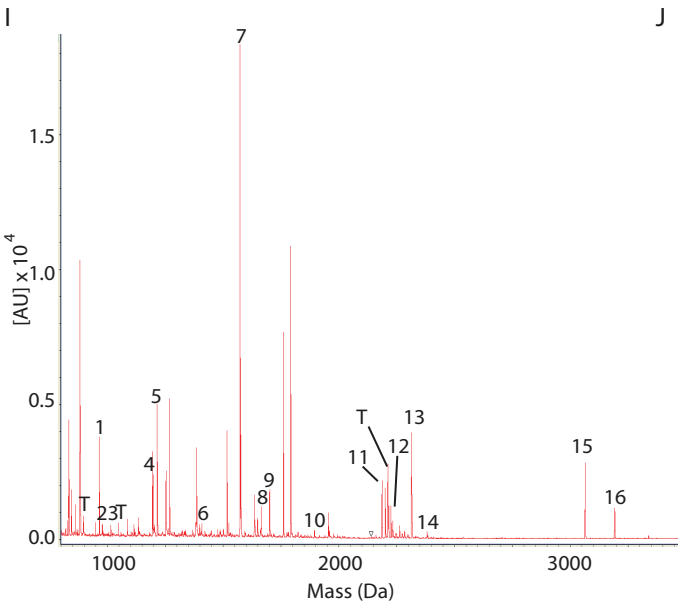

**J**

| Peak# | Mass    | Assigned | Delta (ppm) | Sequence                       |
|-------|---------|----------|-------------|--------------------------------|
| 1     | 963.57  | 963.56   | 13          | YLGQLTR                        |
| 2     | 976.47  | 976.49   | 23          | EIKEDTNK                       |
| 3     | 1013.53 | 1013.53  | 0           | LGIDGTYFK                      |
| 4     | 1193.68 | 1193.67  | 7           | SINVIQHINR                     |
| 5     | 1213.60 | 1213.59  | 11          | SQAFLYTNNR                     |
| 6     | 1397.74 | 1397.73  | 4           | VM*EELVPRFLK                   |
| 7     | 1571.70 | 1571.71  | 5           | SPGPDGFTAIFYQR                 |
| 8     | 1647.84 | 1647.85  | 5           | ENFRPISLMNIDAK                 |
| 9     | 1663.84 | 1663.84  | 2           | ENFRPISLM*NIDAK                |
| 10    | 1893.94 | 1893.92  | 11          | QTESQIM*GELPFVIASK             |
| 11    | 2200.04 | 2200.04  | 4           | LENLEEMDTFLDITYLPR             |
| 12    | 2216.04 | 2216.04  | 0           | LENLEEM*DTFLDITYLPR            |
| 13    | 2314.26 | 2314.28  | 9           | EGILPNSFYEASIIIPKPGR           |
| 14    | 2381.19 | 2381.19  | 1           | LIHHDQVGFIPGM*QGWFNIR          |
| 15    | 3064.76 | 3064.65  | 38          | LNQEEVESLNRPIITGSEIVAIINSLPTK  |
| 16    | 3192.89 | 3192.74  | 47          | LNQEEVESLNRPIITGSEIVAIINSLPTKK |

**K**

```

1  MASTTDPTEI  QTTIREYYKH  LYANKLENLE  EMDTFLDITYT  LPRLNQEVEE  SLNRPITGSE
61  IVAIINSLPT  KKSPGPDGFT  AEFYQRYMEE  LVPFLKLFQ   SIEKEGILPN  SFYEASIIIL
121 PKPGRDITTK  ENFRPISLMN  IDAKILNKIL  ANRIQQHIKK  LIHHDQVGF  PGMQGFNIR
181 KSINVIQHIN  RAKDKNHMII  SIDA EKAFDK  IQQPFMLKTL  NKLGI DGYF  KIIRAIYDKP
241 TANIILNGQK  LEAFPLKTGT  RQGCP LSPLL  FNIVLEVLAR  AIRQEKEIKG  IQLGKEEVKL
301 SLFAADMIVY  LENPIVSAQN  LLKLISNFSK  VSGYKINVQK  SQAFLYTNNR  QTESQIMGEL
361 PFVIASKRIK  YLGIQLTRDV  KDLFKENYKP  LLKEIKEDTN  KWK
    
```
