# Supplementary material
Source: PubMed Central journal article supplement (PMC3401319)
Supplement: NIHMS382543-supplement-3.pdf [file NIHMS382543-supplement-3.pdf]

Figure S2

**A**

| Species | Gag Region | Alignment              |
|---------|------------|------------------------|
| Human   | p15        | ENKTQPPVAYQYWPPAELQYR  |
| Rhesus  | 229-250    | -D-----L-----          |
| Human   | CA         | KSFSIKLLKDLKEGVKQYGPNS |
| Rhesus  | 337-360    | -----M--EM-----        |

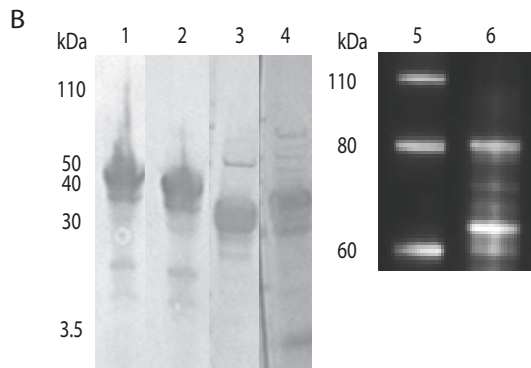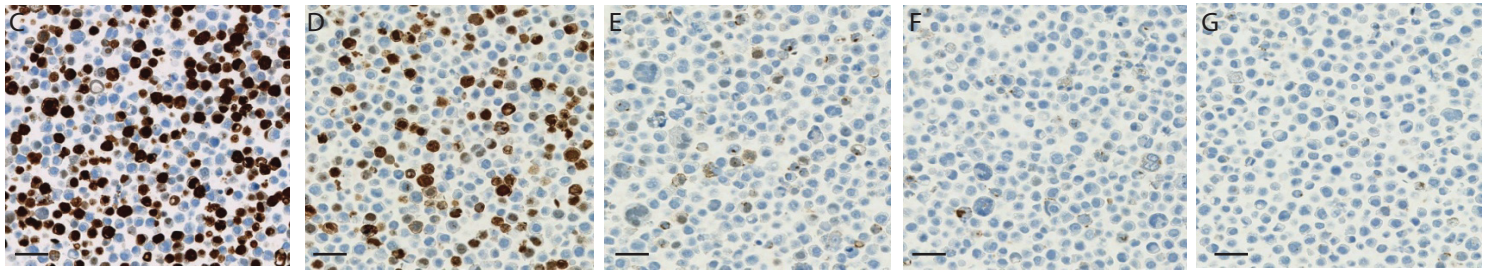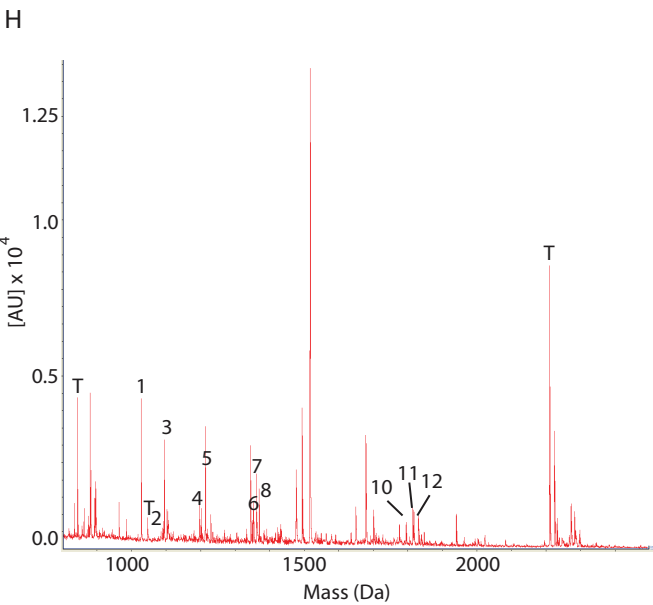

**I**

| Peak# | Mass    | Assigned | Delta (ppm) | Sequence            |
|-------|---------|----------|-------------|---------------------|
| 1     | 1026.54 | 1026.53  | 8           | APYPQPPTTR          |
| 2     | 1091.61 | 1091.57  | 30          | YASYLSFIK           |
| 3     | 1093.58 | 1093.53  | 45          | EPYPDFVAR           |
| 4     | 1195.55 | 1195.52  | 26          | Q+YGPNSPYMR         |
| 5     | 1212.56 | 1212.54  | 19          | QYGPNSPYMR          |
| 6     | 1352.72 | 1352.71  | 8           | GPELVGPSESKPR       |
| 7     | 1360.79 | 1360.75  | 29          | LIPYDWEILAK         |
| 8     | 1368.74 | 1368.74  | 20          | SSLSPSQFLQFK        |
| 9     | 1493.74 | 1493.73  | 7           | QGSKEPYPDFVAR       |
| 10    | 1815.00 | 1814.99  | 4           | AMLMAQAITGVVLGGQVR  |
| 11    | 1818.01 | 1818.01  | 1           | GTSPYPAGQVPVTLQPQK  |
| 12    | 1831.00 | 1830.99  | 9           | AMLMAQAITGVVLGGQVR* |

**J**

```

1  MASGQTKSKI  KSKYASYLSF  IKILLKRGV  KVSTKNLIK  L  FQIIEQFCPW  FPEQGTLDLK
61 DWKRIGKELK  QAGRKGNII  P  LTVWNDWAI  I  KAALEPFQTE  EDSISVSDAP  GSCIIDCNEN
121 TRKKSQKETE  SLHCEYVAE  P  VMAQSTQNV  D  YNQLQEVII  P  ETLKLEGKGP  ELVGPSESKP
181 RGTSPYPAGQ  VPVTLQPQK  Q  VKENKTOPP  V  AYQYWPPAEL  QYRPPPEQY  GYPGMPPAPQ
241 GRAPYPQPPT  RRLNPTAPP  S  RQGSELHEI  I  DKSRKEGDTE  AWQFPVTLEP  MPPGEGAQEG
301 EPPTVEARYK  SFSIKLLKDL  KEGVKQYGP  N  SPYMRLLDS  IAHGHRLLIP  Y  DWEILAKSSL
361 SPSQFLQFKT  WWIDGVQEQ  V  RRNRAANPP  V  NIDADQLLGI  GQNWSTISQQ  ALMQNEAIEQ
421 VRAICLRWE  KIQDPGSTC  P  SFNTVRQGS  K  EPYPDFVARL  QDVAQKSIAD  EKARKVIVEL
481 MAYENANPEC  QSAIKPLKG  K  VPAGSDVISE  Y  YVKACDGIGG  AMHKAMLMAQ  AITGVVLGGQ
541 VRTFGGKCYN  CGQIGHLLK  N  CPVLNKQNI  T  IQATTTGREP  PDLCPCKKG  KHWSQCRSK
601 FDKNGQPLSG  NEQRGQPAP  P  QQTGAFFIQ  P  FVPQGFQGG  Q  PPLSQVFQGI  SQLPQYNNCP
661 PPQAAVQQ
    
```
