# Supplementary material
Source: PubMed Central journal article supplement (PMC3401319)

Figure S3

A

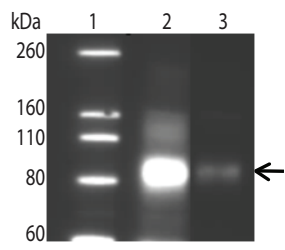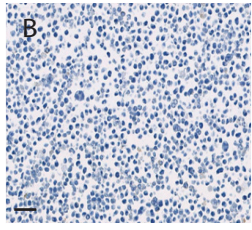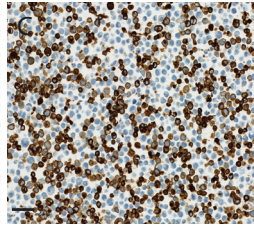

Supplement: NIHMS382543-supplement-4.pdf [file NIHMS382543-supplement-4.pdf]
